# Supplementary material for: The effects of circularly polarized light on mating behavior and gene expression in Anomala corpulenta (Coleoptera: Scarabaeidae)
Source: Front Physiol. 2023 Mar 31;14:1172542. doi: 10.3389/fphys.2023.1172542 (PMC10102372; doi:10.3389/fphys.2023.1172542)
Supplement: Supplementary file 2 [file Table1.XLSX]

## Sheet: Sheet1
Table S1. Primers used in this study
Unigene	Primer name	Primer sequence (5'-3')
TRINITY_DN16306_c0_g1	411 F	CCTTGGCAGGCAGACATACA
	560 R	GCACCTTTGTTGGAACCAGC
TRINITY_DN16497_c0_g1	463 F	CGAGCTATGATCGTCGCTGA
	566 R	CCACCATTGCCAACTGTAGT
TRINITY_DN1913_c0_g1	331 F	CCAGTAGCACCTACACCACC
	410 R	TCTGGTTCTGGATGAGCTGC
TRINITY_DN16090_c0_g1	203 F	GATCATCTGCCAGCTCCCTC
	290 R	TGGTTGAGAACGCTAACGCT
TRINITY_DN22953_c1_g5	1,452 F	TTGGCATTAGCAGGACCAGG
	1,547 R	TGCTTGGGGGCTAGAAACAG
TRINITY_DN21622_c1_g5	246 F	TGTGAATGGACGGAATGCCA
	347 R	ATAAGGCTGCCACCACAGTC
